# Supplementary material
Source: PubMed Central journal article supplement (PMC6532427)
Supplement: NIHMS1024270-supplement-1.pdf [file NIHMS1024270-supplement-1.pdf]

1 **Supplementary Figure 1.**

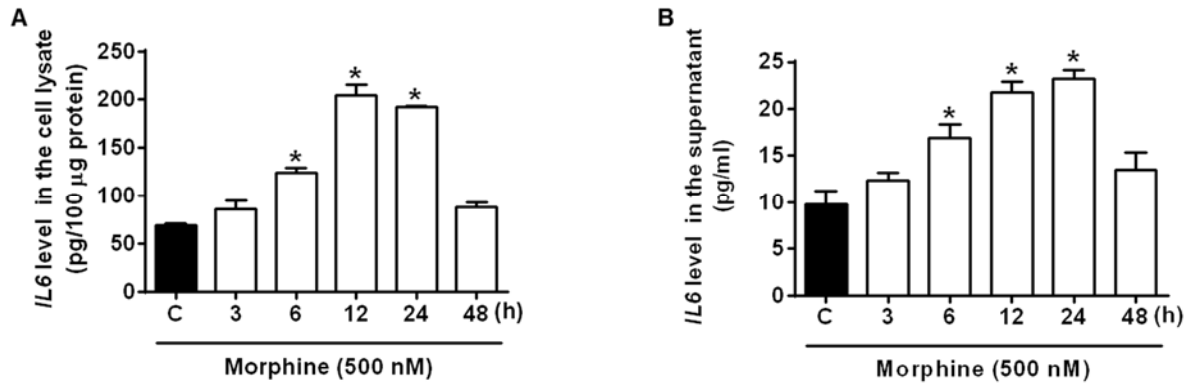

2

3 Morphine-mediated production of IL6 in human primary astrocytes. ELISA showing the  
4 time-dependent upregulation in protein levels of proinflammatory cytokine IL6 in the cell  
5 lysates (A) and supernatants (B) of human primary astrocytes. Data are presented as  
6 mean  $\pm$  SEM; n = 6. Non-parametric Kruskal-Wallis One-way ANOVA followed by Dunn's  
7 *post hoc* test was used to determine the statistical significance between multiple groups:

8 \*, P < 0.05 vs. control.
